# Supplementary material for: Cryptochrome Is a Regulator of Synaptic Plasticity in the Visual System of Drosophila melanogaster
Source: PubMed Central journal article supplement (PMC5448152; doi:10.3389/fnmol.2017.00165), 2017-05-30
Supplement: Presentation_1.pdf [file Presentation_1.pdf]

*Supplementary Material*

**Cryptochrome is a regulator of synaptic plasticity in the visual system  
of *Drosophila melanogaster***

**Damulewicz Milena<sup>\*</sup>, Mazzotta Gabriella Margherita, Sartori Elena, Rosato Ezio, Costa  
Rodolfo, Pyza Elzbieta**

**\* Correspondence:**

milena.damulewicz@uj.edu.pl

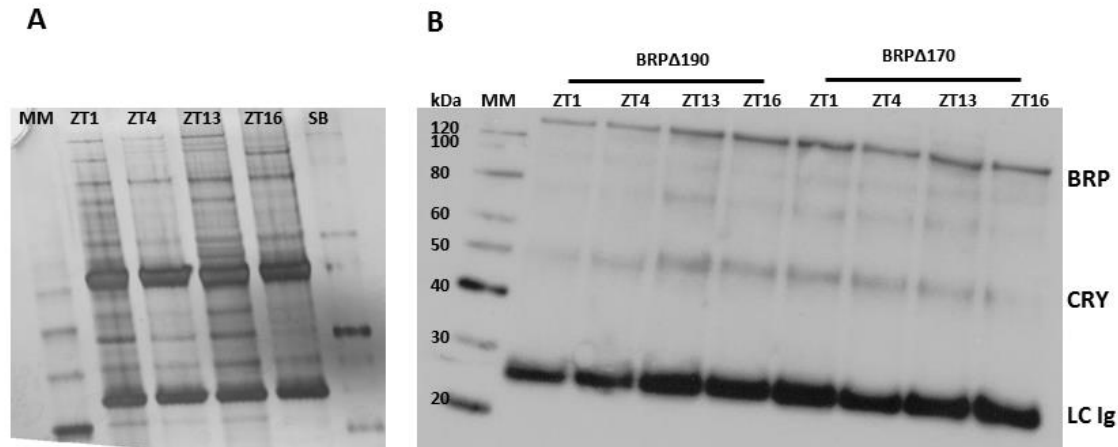

Fig.S1 **BRP forms multiprotein complexes *in vivo***. BRP was precipitated from whole head protein extracts at four time points: ZT1, ZT4, ZT13, ZT16 and then incubated with nc82 antibodies bound onto magnetic beads (Dynabeads). (A) Co-immunoprecipitating (coIP) proteins from Canton S flies were resolved by PAGE and then visualized by silver staining on gel. The figure shows that dozens of different proteins may bind to BRP. MM - MagicMark marker, SB- SeaBlue marker. (B) coIP proteins from mutants *brp*<sup>Δ190</sup> and *brp*<sup>Δ170</sup> were analyzed by Western blot and then probed with  $\alpha$ -BRP and  $\alpha$ -CRY primary antibodies. The blot shows the 170kDa and 190kDa BRP isoforms, respectively and a weak signal for the coIP CRY. We can detect a strong cross-hybridization signal from the light chain Immunoglobulin (LC Ig), whereas the secondary antibodies used in this reaction did not recognize the heavy chain Ig. MM- Magic Mark marker.
